# Supplementary material for: Functionalized nanomaterials: are they effective to perform gene delivery to difficult-to-transfect cells with no cytotoxicity?
Source: Royal Society of Chemistry journal article supplement (doi:10.1039/c5nr04173b), 2015-01-01
Supplement: c5nr04173b1.pdf [file c5nr04173b1.pdf]

Received 00th January 20xx,  
Accepted 00th January 20xx

DOI: 10.1039/x0xx00000x

www.rsc.org/

## Functionalized nanomaterials: are they effective to perform gene delivery to difficult-to-transfect cells with no cytotoxic?

F. M. P. Tonelli,<sup>a</sup> S. M. S. N. Lacerda,<sup>b</sup> N. C. O. Paiva,<sup>a</sup> F. G. Pacheco,<sup>c</sup> S. R. A. Scalzo Junior,<sup>d</sup> F. H. P. de Macedo,<sup>e</sup> M. C. X. Pinto,<sup>a</sup> J. S. Cruz,<sup>e</sup> Corrêa Junior, J. D.,<sup>f</sup> L. O. Ladeira,<sup>g</sup> L. R. França,<sup>b</sup> S. Guatimosim,<sup>d</sup> and R. R. Resende<sup>a</sup>

### Electronic supplementary materials

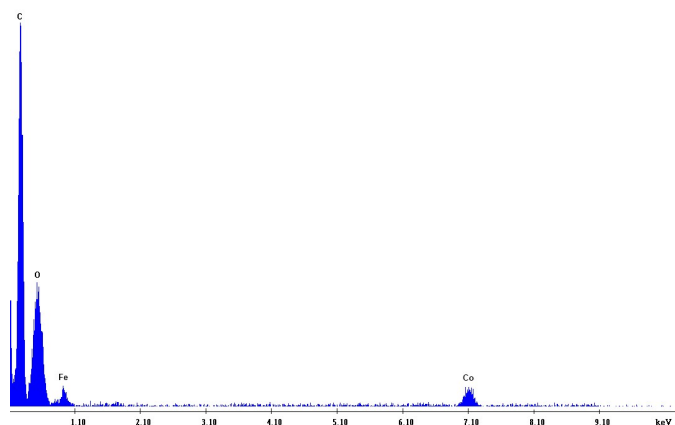

Figure S1: Energy dispersive X-ray (EDX) spectrum of fMWCNTs.

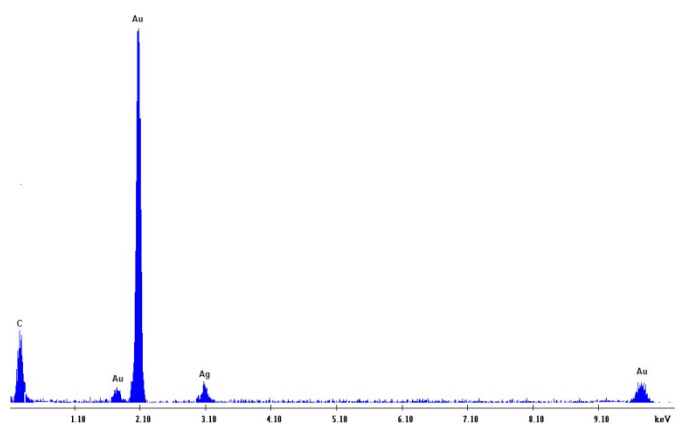

Figure S2: Energy dispersive X-ray (EDX) spectrum of NRs.

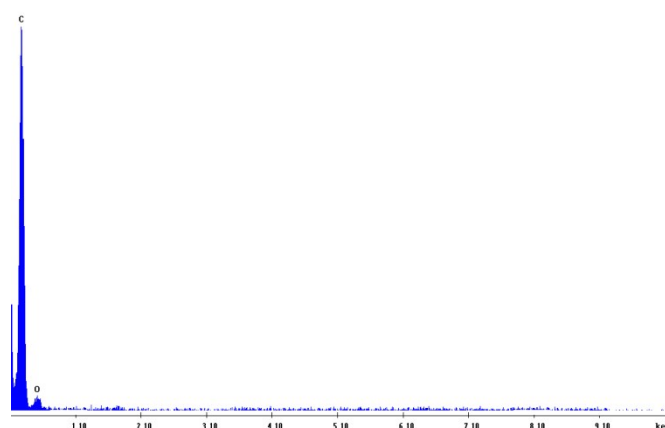

Figure S3: Energy dispersive X-ray (EDX) spectrum of NDs.

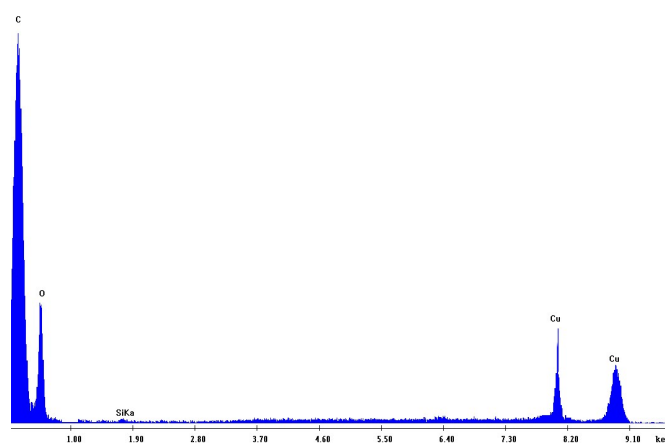

Figure S4: Energy dispersive X-ray (EDX) spectrum of NGOs.

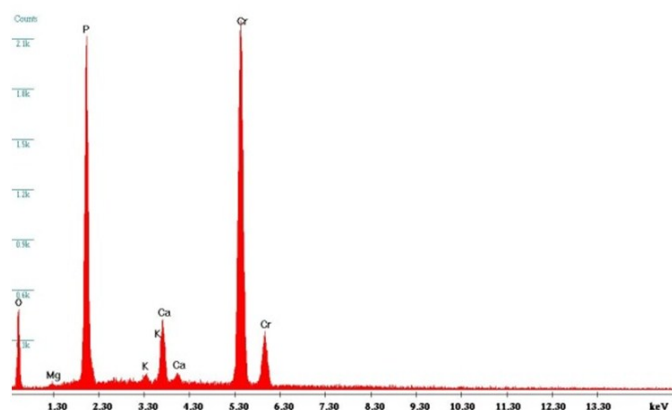

**Figure S5:** Energy dispersive X-ray (EDX) spectrum of NPCs.

*J Mol Cell Cardiol*, 2012,**53**, 206–16.

2. H. C. Joca, D. C. Vieira, A. P. Vasconcelos, D. A. Araújo, and J. S. Cruz, *Eur J Pharmacol.*, 2015, **756**, 22–27.

## Cell culture

**Cardiomyocytes** were obtained from rats and cultivated as previously described<sup>1</sup>. Briefly, in the primary culture cardiac cells were plated in dishes using M199 medium supplemented with: 100 units/ml penicillin, 100 µg/ml streptomycin, 10% Fetal Bovine Serum, 2 mmol/L L-glutamine, and 20 µg/mL cytosine-D-arabinofuranoside (ARA-c) (to prevent growth of fibroblasts). After 48 hours, neonatal cardiomyocytes were exposed to the nanomaterials, with and without DNA<sup>1</sup>.

**DRG neurons** were also obtained and cultivated as previously described<sup>2</sup>. Briefly, cells were obtained from animals lumbar segments using enzymatic procedure. Then they were washed in Dulbecco's Modified Eagle's Medium (DMEM) (Sigma) supplemented with 10% Fetal Bovine Serum and 1% penicillin (Cultilab), and plated in dishes pre-treated with poly-D-lysine 0,1% (Sigma). After 24 hours, cells were exposed to the samples containing nanomaterials or Lipofectamine (with or without DNA)<sup>2</sup>.

**Lineage C6 cells**(ATTC CCL-107) were cultivated in T-75 bottles until 90% of confluence was achieved, and then the cells were plated in dishes using DMEM high glucose (Gibco) supplemented with 10% Fetal Bovine Serum,(Gibco), 2,5UI/mL of penicillin, 2,5ug/mL de streptomycin and 5ug/mL of gentamicin.

**Lineage U373 cells** were cultivated as same as C6 cells. In T-75 bottles until 90% of confluence was achieved, and then were plated in dishes using DMEM high glucose (Gibco) supplemented with 10% Fetal Bovine Serum,(Gibco), 2,5UI/mL of penicillin, 2,5ug/mL de streptomycin and 5ug/mL of gentamicin.

## Reference List

1. C. Rocha-Resende, A. Roy, R. R. Resende, M. S. Ladeira, A. Lara, E. R. M. Gomes, V. F. Prado, R. Gros, C. Guatimosim, M. A. M. Prado, S. Guatimosim
